# Supplementary material for: Induction of immunogenic cell death of tumors by newly synthesized heterocyclic quinone derivative
Source: PubMed Central journal article supplement (PMC5345761; doi:10.1371/journal.pone.0173121), 2017-03-10
Supplement: pone.0173121.s001.pdf [file pone.0173121.s001.pdf]

| Genes   | GeneName                                                    | Forward primer (5' → 3')          | Reverse primer (5' → 3')       | Temperature (°C) | Genbank Accession |
|---------|-------------------------------------------------------------|-----------------------------------|--------------------------------|------------------|-------------------|
| Rfx3    | regulatory factor X, 3 (influences HLA class II expression) | 5'-GCCCATGCAACAGAAG<br>CAAA-3'    | 5'-GGACGTCGGGGAT<br>GAGAATC-3' | 60               | NM_011265         |
| Cd274   | CD274 antigen (B7-1)                                        | 5'-AAGGGAAATGCTGCCC<br>TTCA-3'    | 5'-TCATGCTCAGAAGT<br>GGCTGG-3' | 59.3             | NM_021893         |
| Il12rb1 | interleukin 12 receptor, beta 1                             | 5'-CTCACCCCTTAGGACCC<br>AGGA-3'   | 5'-CCGGCCTCTTCAGA<br>CACATT-3' | 58.7             | NM_008353         |
| Il10rb  | interleukin 10 receptor, beta                               | 5'-AGAGTCAGGGCTGAAT<br>TGGC-3'    | 5'-GTAAGTTGTCCACG<br>GCTCCA-3' | 59.7             | NM_008349         |
| Tgfb3   | transforming growth factor, beta 3                          | 5'-GTCACTGGAGTTGTAC<br>GGCA-3'    | 5'-GAAGTTGGCATGGT<br>AGCCCT-3' | 60               | NM_009368         |
| Tlr6    | toll-like receptor 6                                        | 5'-AATGGTACCGTCAGTG<br>CTGG-3'    | 5'-GTGAGCAACTGGGA<br>GCAGAT-3' | 60               | NM_011604         |
| Tlr4    | toll-like receptor 4                                        | 5'-GGTCAGCAAACGCCTT<br>CTTC-3'    | 5'-TTTTGTCTCCACAG<br>CCACCA-3' | 59.7             | NM_021297         |
| Casp8   | caspase 8                                                   | 5'-ATGAGCCTCAAAATGG<br>CGGA-3'    | 5'-CCAGCAGAAAGTCT<br>GCCTCA-3' | 60               | NM_009812         |
| CRT     | calreticulin                                                | 5'-CGAGCTTCAAGCCATT<br>CAGC-3'    | 5'-TGAAGCCATCCACC<br>TTGCAT-3' | 59.9             | NM_028500         |
| GAPDH   | glyceraldehyde-3-phosphate dehydrogenase                    | 5'-GGCGTGAACCACGAG<br>AAGTATAA-3' | 5'-CCCTCCACGATGCC<br>AAAGT-3'  | 57               | NM_008084         |

S1 Table. Primer design of RT-PCR.
