# Supplementary material for: Induction of immunogenic cell death of tumors by newly synthesized heterocyclic quinone derivative
Source: PubMed Central journal article supplement (PMC5345761; doi:10.1371/journal.pone.0173121), 2017-03-10
Supplement: pone.0173121.s003.pdf [file pone.0173121.s003.pdf]

| Gene Symbol | LLC_R2016/LLC_Cont.fc | LLC_Doxo/LLC_Cont.fc | Genbank Accession | GeneName                                                               | Chromosome |
|-------------|-----------------------|----------------------|-------------------|------------------------------------------------------------------------|------------|
| Akt2        | -2.030292             | 1.10419              | NM_001110208      | thymoma viral proto-oncogene 2                                         | chr19      |
| Cdkn1a      | 3.334137              | 1.291208             | NM_007669         | cyclin-dependent kinase inhibitor 1A (P21)                             | chr6       |
| Cish        | 2.419534              | -1.093602            | NM_009895         | cytokine inducible SH2-containing protein                              | chr3       |
| Cntf        | 2.168157              | 1.379385             | NM_170786         | ciliary neurotrophic factor                                            | chr9       |
| Ghr         | -2.735856             | -1.921325            | NM_010284         | growth hormone receptor                                                | chr20      |
| Il15        | 2.983048              | 2.157364             | NM_008357         | interleukin 15                                                         | chr4       |
| Jak1        | -2.410116             | -1.655833            | NM_146145         | Janus kinase 1                                                         | chr1       |
| Jak2        | -3.060234             | 1.128074             | NM_008413         | Janus kinase 2                                                         | chr9       |
| Jak3        | -2.967493             | -1.38365             | NM_010589         | Janus kinase 3                                                         | chr19      |
| Myc         | -2.309942             | -2.582027            | NM_010849         | myelocytomatosis oncogene                                              | chr8       |
| Pias2       | 1.333311              | -1.232003            | NM_001164170      | protein inhibitor of activated STAT 2                                  | Chr18      |
| Pik3r3      | -2.099545             | 1.923916             | NM_181585         | phosphatidylinositol 3 kinase, regulatory subunit, polypeptide 3 (p55) | chr1       |
| Socs2       | 2.930192              | -1.557418            | NM_007706         | suppressor of cytokine signaling 2                                     | chr12      |
| Stat6       | -3.762501             | -2.326166            | NM_009284         | signal transducer and activator of transcription 6                     | chr12      |
| Tyk2        | -2.608026             | -1.649379            | NM_018793         | tyrosine kinase 2                                                      | chr19      |
| Rfx2        | 2.769875              | -1.672132            | NM_009056         | regulatory factor X, 2 (influences HLA class II expression)            | chr19      |
| Rfx1        | 2.487852              | 1.034525             | NM_009055         | regulatory factor X, 1 (influences HLA class II expression)            | chr19      |
| Rfx3        | 2.831504              | -1.863057            | NM_011265         | regulatory factor X, 3 (influences HLA class II expression)            | chr9       |
| Cd274       | 2.571199              | -1.030565            | NM_021893         | CD274 antigen                                                          | chr9       |
| Il12rb1     | 2.507673              | 1.260033             | NM_008353         | interleukin 12 receptor, beta 1                                        | chr19      |
| Il10rb      | -2.186055             | -1.576155            | NM_008349         | interleukin 10 receptor, beta                                          | chr21      |
| Tab1        | -2.459215             | -1.513442            | NM_025609         | TGF-beta activated kinase 1/MAP3K7 binding protein 1                   | chr22      |
| Tgfb3       | -3.141441             | -1.081801            | NM_009368         | transforming growth factor, beta 3                                     | chr14      |
| Tnfrsf12a   | 2.466106              | 1.892503             | NM_013749         | tumor necrosis factor receptor superfamily, member 12a                 | chr16      |
| Tradd       | 2.16445               | 1.043845             | NM_001033161      | TNFRSF1A-associated via death domain                                   | chr16      |
| Foxred1     | 2.099648              | -1.081674            | NM_172291         | FAD-dependent oxidoreductase domain containing 1                       | chr11      |
| Fadd        | 2.124401              | 1.293331             | NM_010175         | Fas (TNFRSF6)-associated via death domain                              | chr11      |
| Cflar       | 3.051033              | 1.54687              | NM_009805         | CASP8 and FADD-like apoptosis regulator                                | chr2       |
| Foxred2     | 3.15514               | -1.219645            | NM_001017983      | FAD-dependent oxidoreductase domain containing 2                       | chr22      |
| Thr6        | -2.930072             | -3.030856            | NM_011604         | toll-like receptor 6                                                   | chr4       |
| Thr4        | -2.304294             | -1.278888            | NM_021297         | toll-like receptor 4                                                   | chr9       |
| Cd2         | 2.554345              | -1.310173            | NM_011333         | chemokine (C-C motif) ligand 2                                         | chr9       |
| Cxd16       | 2.656384              | 1.364963             | NM_023158         | chemokine (C-X-C motif) ligand 16                                      | chr17      |
| Cx3cl1      | 2.242412              | -1.064751            | NM_009142         | chemokine (C-X3-C motif) ligand 1                                      | chr16      |
| Cxd10       | 3.358864              | -2.525679            | NM_021274         | chemokine (C-X-C motif) ligand 10                                      | chr4       |
| Cxd11       | 2.08537               | 1.07388              | NM_019494         | chemokine (C-X-C motif) ligand 11                                      | chr4       |
| Cd19        | 3.651656              | 1.233631             | NM_011888         | chemokine (C-C motif) ligand 19                                        | chr9       |
| Casp3       | 1.004281              | 1.526122             | NM_009810         | caspase 3                                                              | chr4       |
| Casp8       | -1.062625             | 1.147706             | NM_009812         | caspase 8                                                              | chr2       |
| CRT         | 3.485357              | 1.165586             | NM_028500         | calreticulin 3                                                         | chr19      |

S3 Table. Functional classification of differentially expressed genes in B16F10.
